# Supplementary material for: The Virtual “Enfacement Illusion” on Pain Perception in Patients Suffering from Chronic Migraine: A Study Protocol for a Randomized Controlled Trial
Source: MDPI journal article supplement (doi:10.3390/jcm11226876), 2022-11-21
Supplement: s1 [file s1]

SPIRIT 2013 Checklist: Recommended items to address in a clinical trial protocol and related documents.

| Section/item                      | Item No | Description                                                                                                                                                                                                                                                              |
|-----------------------------------|---------|--------------------------------------------------------------------------------------------------------------------------------------------------------------------------------------------------------------------------------------------------------------------------|
| <b>Administrative information</b> |         |                                                                                                                                                                                                                                                                          |
| Title                             | 1       | Descriptive title identifying the study design, population, intervention<br>Page 1                                                                                                                                                                                       |
| Trial registration                | 2a      | Trial identifier and registry name.<br>Trial registration: NCT04904458 on 27 May 2021.<br>Registry name: Clinicaltrials.gov.<br><br><a href="https://clinicaltrials.gov/ct2/show/NCT04904458">https://clinicaltrials.gov/ct2/show/NCT04904458</a><br>Page 14             |
|                                   | 2b      | World Health Organization Trial Registration Data Set<br>Not applicable                                                                                                                                                                                                  |
| Protocol version                  | 3       | Date and version identifier<br>Page 14                                                                                                                                                                                                                                   |
| Funding                           | 4       | Sources and types of financial, material, and other support<br>Page 14                                                                                                                                                                                                   |
| Roles and responsibilities        | 5a      | Names, affiliations of protocol contributors: page 1<br>Roles of protocol contributors: page 13                                                                                                                                                                          |
|                                   | 5b      | Name and contact information for the trial sponsor:<br>Page 13                                                                                                                                                                                                           |
|                                   | 5c      | Role of study sponsor/funder in study design, data collection, analysis, and interpretation of data; writing of the report.<br>Page 13                                                                                                                                   |
|                                   | 5d      | Composition, roles, and responsibilities of the coordinating centre, steering committee, endpoint adjudication committee, data management team, and other individuals or groups overseeing the trial, if applicable (see Item 21a for data monitoring)<br>Not applicable |
| <b>Introduction</b>               |         |                                                                                                                                                                                                                                                                          |
| Background and rationale          | 6a      | Description of research question and justification for undertaking the trial, including summary of relevant studies<br>Page 1-3                                                                                                                                          |
|                                   | 6b      | Explanation for choice of comparators<br>Page 3                                                                                                                                                                                                                          |
| Objectives                        | 7       | Specific objectives or hypotheses<br>Page 3                                                                                                                                                                                                                              |

|              |   |                                                                                                  |
|--------------|---|--------------------------------------------------------------------------------------------------|
| Trial design | 8 | Description of trial design including type of trial (RCT), and framework (superiority)<br>Page 4 |
|--------------|---|--------------------------------------------------------------------------------------------------|

### **Methods: Participants, interventions, and outcomes**

|                      |     |                                                                                                                                                                                                  |
|----------------------|-----|--------------------------------------------------------------------------------------------------------------------------------------------------------------------------------------------------|
| Study setting        | 9   | Description of study setting<br>Page 4                                                                                                                                                           |
| Eligibility criteria | 10  | Inclusion and exclusion criteria for participants<br>Page 4-5<br>individuals who will perform the intervention<br>Page 7                                                                         |
| Interventions        | 11a | Interventions for each group with sufficient detail to allow replication, including how and when they will be administered<br>Page 7-9<br>Figure 3, 4, 5, 6                                      |
|                      | 11b | Criteria for discontinuing intervention for a given trial participant<br>page 7, 11                                                                                                              |
|                      | 11c | Strategies to improve adherence to intervention protocols<br>Page 11                                                                                                                             |
|                      | 11d | Relevant concomitant care and interventions that are permitted or prohibited during the trial<br>Page 5                                                                                          |
| Outcomes             | 12  | Primary, secondary, and other outcomes, including the specific measurement variables analysis metric<br>Pages 9-10<br>Table 1                                                                    |
| Participant timeline | 13  | Time schedule of enrolment, interventions (including any run-ins and washouts), assessments, and visits for participants.<br>Page 4<br>Figure 1                                                  |
| Sample size          | 14  | Estimated number of participants needed to achieve study objectives and how it was determined, including clinical and statistical assumptions supporting any sample size calculations<br>Page 10 |
| Recruitment          | 15  | Strategies for achieving adequate participant enrolment to reach target sample size<br>Pages 5                                                                                                   |

### **Methods: Assignment of interventions (for controlled trials)**

#### Allocation:

|                     |     |                                                                                                                                             |
|---------------------|-----|---------------------------------------------------------------------------------------------------------------------------------------------|
| Sequence generation | 16a | Method of generating the allocation sequence (eg, computer-generated random numbers), and list of any factors for stratification.<br>Page 6 |
|---------------------|-----|---------------------------------------------------------------------------------------------------------------------------------------------|

|                                  |     |                                                                                                                                                                                                                     |
|----------------------------------|-----|---------------------------------------------------------------------------------------------------------------------------------------------------------------------------------------------------------------------|
| Allocation concealment mechanism | 16b | Mechanism of implementing the allocation sequence (eg, central telephone; sequentially numbered, opaque, sealed envelopes), describing any steps to conceal the sequence until interventions are assigned<br>Page 6 |
| Implementation                   | 16c | Who will generate the allocation sequence, who will enrol participants, and who will assign participants to interventions<br>Page 6                                                                                 |
| Blinding (masking)               | 17a | Who will be blinded after assignment to interventions (eg, trial participants, care providers, outcome assessors, data analysts), and how<br>Page 6                                                                 |
|                                  | 17b | If blinded, circumstances under which unblinding is permissible, and procedure for revealing a participant's allocated intervention during the trial<br>Not applicable                                              |

### **Methods: Data collection, management, and analysis**

|                         |     |                                                                                                                                                                                                                                                                                  |
|-------------------------|-----|----------------------------------------------------------------------------------------------------------------------------------------------------------------------------------------------------------------------------------------------------------------------------------|
| Data collection methods | 18a | Plans for assessment and collection of outcome, baseline, and other trial data;<br>Page 5.<br><br>description of study instruments;<br>Page 5                                                                                                                                    |
|                         | 18b | Plans to promote participant retention and complete follow-up, including list of any outcome data to be collected for participants who discontinue or deviate from intervention protocols<br>Not applicable                                                                      |
| Data management         | 19  | Plans for data entry, coding, security, and storage, including any related processes to promote data quality (eg, double data entry; range checks for data values). Reference to where details of data management procedures can be found, if not in the protocol<br>Pages 10-11 |
| Statistical methods     | 20a | Statistical methods for analysing primary and secondary outcomes. Reference to where other details of the statistical analysis plan can be found, if not in the protocol<br>Pages 10-11                                                                                          |
|                         | 20b | Methods for any additional analyses (eg, subgroup and adjusted analyses)<br>Pages 10-11                                                                                                                                                                                          |
|                         | 20c | Definition of analysis population relating to protocol non-adherence (eg, as randomised analysis), and any statistical methods to handle missing data (eg, multiple imputation)<br>Page 11                                                                                       |

### **Methods: Monitoring**

|                 |     |                                                                                                                                     |
|-----------------|-----|-------------------------------------------------------------------------------------------------------------------------------------|
| Data monitoring | 21a | Composition of data monitoring committee (DMC); Alternatively, an explanation of why a DMC is not needed.<br>Page 11. Not required. |
|-----------------|-----|-------------------------------------------------------------------------------------------------------------------------------------|

|          |     |                                                                                                                                                                                              |
|----------|-----|----------------------------------------------------------------------------------------------------------------------------------------------------------------------------------------------|
|          | 21b | Description of any interim analyses and stopping guidelines<br>Not applicable.                                                                                                               |
| Harms    | 22  | Plans for collecting, assessing, reporting, and managing solicited and spontaneously reported adverse events and other unintended effects of trial interventions or trial conduct<br>Page 11 |
| Auditing | 23  | Frequency and procedures for auditing trial conduct, if any, and whether the process will be independent from investigators and the sponsor<br>Not applicable                                |

### **Ethics and dissemination**

|                               |     |                                                                                                                                                                                                                                                                                                 |
|-------------------------------|-----|-------------------------------------------------------------------------------------------------------------------------------------------------------------------------------------------------------------------------------------------------------------------------------------------------|
| Research ethics approval      | 24  | Ethics approval<br>Pages 11, 13                                                                                                                                                                                                                                                                 |
| Protocol amendments           | 25  | Plans for communicating important protocol modifications (eg, changes to eligibility criteria, outcomes, analyses) to relevant parties (eg, investigators, REC/IRBs, trial participants, trial registries, journals, regulators)<br>Page 11                                                     |
| Consent or assent             | 26a | Who will obtain informed consent or assent from potential trial participants or authorised surrogates, and how (see Item 32)<br>Page 5                                                                                                                                                          |
|                               | 26b | Additional consent provisions for collection and use of participant data and biological specimens in ancillary studies, if applicable<br>Not applicable.                                                                                                                                        |
| Confidentiality               | 27  | How personal information about potential and enrolled participants will be collected, shared, and maintained in order to protect confidentiality before, during, and after the trial<br>Pages 11                                                                                                |
| Declaration of interests      | 28  | Financial and other competing interests for principal investigators for the overall trial and each study site<br>Page 14                                                                                                                                                                        |
| Access to data                | 29  | Statement of who will have access to the final trial dataset, and disclosure of contractual agreements that limit such access for investigators<br>Pages 10-11                                                                                                                                  |
| Ancillary and post-trial care | 30  | Provisions, if any, for ancillary and post-trial care, and for compensation to those who suffer harm from trial participation<br>Not applicable, no provisions planned, no major risks associated with study participation                                                                      |
| Dissemination policy          | 31a | Plans for investigators and sponsor to communicate trial results to participants, healthcare professionals, the public, and other relevant groups (eg, via publication, reporting in results databases, or other data sharing arrangements), including any publication restrictions<br>Pages 11 |

- 31b Authorship eligibility guidelines and any intended use of professional writers  
All named authors adhere to the authorship guidelines of Trials. All authors have agreed to publication.  
Page 14
- 31c Plans, if any, for granting public access to the full protocol, participant-level dataset, and statistical code  
Page 10, 11, 14

## Appendices

|                            |    |                                                                                                                                                                                                                   |
|----------------------------|----|-------------------------------------------------------------------------------------------------------------------------------------------------------------------------------------------------------------------|
| Informed consent materials | 32 | Model consent form and other related documentation given to participants and authorised surrogates<br>The consent form and materials are available from the corresponding author on request.                      |
| Biological specimens       | 33 | Plans for collection, laboratory evaluation, and storage of biological specimens for genetic or molecular analysis in the current trial and for future use in ancillary studies, if applicable<br>Not applicable. |

---
